# Supplementary material for: HOXC6-Mediated miR-188-5p Expression Induces Cell Migration through the Inhibition of the Tumor Suppressor FOXN2
Source: MDPI journal article supplement (doi:10.3390/ijms23010009), 2021-12-21

Supplementary Table S1. Potential target genes of mir-188-5p predicted by TargetScan

| Gene symbol | uniport accession number | Cumulative weighted context++ score (Targetscan) |
|-------------|--------------------------|--------------------------------------------------|
| IL6ST       | P40189                   | -1.04                                            |
| RSPO3       | Q9BXY4                   | -0.89                                            |
| FOXN2       | P32314                   | -0.6                                             |
| GATAD1      | Q8WUU5                   | -0.57                                            |
| ZFP91       | Q96JP5                   | -0.54                                            |
| XRCC5       | P13010                   | -0.54                                            |
| SLC22A3     | O75751                   | -0.48                                            |
| TMEM39A     | Q9NV64                   | -0.47                                            |
| CCNG1       | P51959                   | -0.46                                            |
| CBFB        | Q13951                   | -0.46                                            |
| PTEN        | Q8T9S7                   | -0.43                                            |
| C6orf106    | Q9H6K1                   | -0.41                                            |
| CCDC6       | Q16204                   | -0.41                                            |
| RAP2C       | Q9Y3L5                   | -0.4                                             |
| SRSF7       | Q16629                   | -0.39                                            |
| CCNT2       | O60583                   | -0.37                                            |
| C9orf72     | Q96LT7                   | -0.37                                            |
| KLF10       | Q13118                   | -0.35                                            |
| TNFSF4      | P23510                   | -0.34                                            |
| CD2AP       | Q9Y5K6                   | -0.34                                            |

Supplementary Figure S1.

### mir-188-5p targets prediction

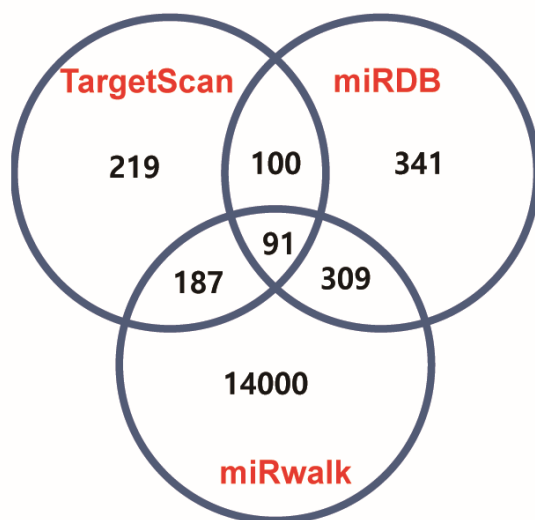

Supplement: s1 [file s1]
